# Supplementary material
Source: PubMed Central journal article supplement (PMC7472940)

# T3-1: Preparation for emergency intubation of a COVID-19 patient

**Objective:** Preparation of equipment and staff for intubation of a suspected COVID-19 patient. To be used in conjunction with **T2-1: Donning Personal Protective Equipment for a COVID-19 patient in theatre**

## Pre-intubation

### IN CLEAN ROOM

- 1 Assemble team in clean room**
  - ▷ Perform team introductions
  - ▷ Three hot-room team roles: intubator, airway assistant, drug administration/monitoring
  - ▷ Clean-room team roles: runner/donning buddy
- 2 Prepare for intubation**
  - ▷ Request COVID airway supplies trolley
  - ▷ Check *intubation equipment list*
  - ▷ Prepare airway equipment and rescue devices on a metal trolley
  - ▷ Assemble breathing system prior to intubation
  - ▷ Plan for airway difficulty and brief team (see *T3-2: Intubation of a COVID-19 patient*)
- 3 Check patient has an ID wristband**
- 4 Check patient allergy status**
- 5 Remove personal items e.g. mobile phone, ID badge, keys from pockets**
- 6 Don and check AGP PPE equipment**
- 7 Move to hot room**
  - ▷ Take ONLY the metal trolley into the hot room
  - ▷ Any additional equipment will be handed through by the runner

## Intubation Equipment List

### Intubation Equipment:

- Appropriately sized tracheal tube with subglottic suction
- Airtraq and screen or I-view videolaryngoscope
- Direct laryngoscope
- Bougie and stylet
- Tube tie
- Syringe
- Cuff manometer

### Breathing Circuit:

- DO NOT USE High Flow Nasal Oxygenation
- Inline suction system
- Tracheal tube clamp
- Mainstream capnograph preferred; side stream on clean-side if no alternative
- If anaesthetic machine is being used:
  - HME filters at both patient and machine ends of circuit
  - DO NOT USE side-stream gas analyser where mainstream capnograph available
  - DO NOT use a Waters Circuit
- If no anaesthetic machine is available:
  - Waters Circuit with HME filter between patient and APL will be necessary
  - Place HME filters at the patient end of the circuit, and at the ventilator if possible

### Drugs and IV access:

- Induction drugs for RSI
- Emergency drugs e.g. vasopressors
- Maintenance drugs and equipment e.g. propofol and pumps
- IV cannula, dressing, tourniquet with spares immediately available in clean room

### Rescue Devices:

- Alternative supraglottic airways in a range of sizes
- Prepare an Aintree Intubating Catheter, an Ambu-scope Slim and a monitor in the clean room, but do not take it in to the hot room until needed at *Plan B: Secondary Intubation*
- Marker pen
- Emergency front of neck airway kit (scalpel, bougie, tube)



# T3-2: Emergency intubation of a COVID-19 patient

**Objective:** Intubation of a suspected COVID-19 patient minimising risk to staff. Only essential staff should enter the room with the patient. To be used in conjunction with **T2-1: Donning Personal Protective Equipment for a COVID-19 patient in theatre**

## Intubation

### IN HOT ROOM

- 1 Receive patient on trolley**
  - ▷ Check HME filters at both ends of breathing circuit and Yankauer sucker available
  - ▷ Check patient positioning, monitoring, and room ergonomics are suitable for intubation
  - ▷ Check landmarks for front of neck airway and mark cricothyroid membrane
- 2 Check IV access adequate and functional then connect IV fluids**
- 3 Pre-oxygenate for at least 5 minutes with tight seal on mask**
  - ▷ Consider 5cmH<sub>2</sub>O PEEP
- 4 Apply cricoid pressure if appropriate, then give RSI drugs**
  - ▷ if hypoxia low pressure/low volume mask ventilation (two handed technique)
- 5 Turn oxygen off before removing mask**
  - ▷ Perform *Plan A: Primary intubation*
- 6 If intubation successful:**
  - ▷ Perform *post-intubation actions*
- 7 If laryngoscopy difficult:**
  - ▷ Insert iGel and ventilate
  - ▷ Perform *Plan B: Secondary Intubation*
  - ▷ If successful perform *post-intubation actions*
- 8 If cannot ventilate via iGel:**
  - ▷ Perform *Plan C: Mask ventilation*
- 9 If cannot mask ventilate:**
  - ▷ Perform *Plan D: Front of neck airway*
  - ▷ Perform *post-intubation actions*

## Airway Plans

### Plan A: Primary Intubation

- Laryngoscopy with Airtraq and screen or I-view videolaryngoscope preferred
- Direct laryngoscopy if this is the most familiar technique

### Plan B: Secondary Intubation

- Request Ambu-scope Slim and Aintree Intubating Catheter from clean room:
  - Load Aintree Intubating Catheter on to Ambu-scope
  - Insert Aintree Intubating Catheter via iGel using Ambu-scope
  - Remove Ambu-scope and iGel; leave Aintree Intubating Catheter in trachea
  - Intubate over Aintree Intubating Catheter
  - Remove Aintree Intubating Catheter

### Plan C: Mask Ventilation

- Low pressure/low volume mask ventilation
- Two-handed technique to maintain seal

### Plan D: Front of Neck Airway

- Scalpel (size 10 blade)
- Bougie
- Size 6.0 tracheal tube

## Post-intubation Actions

- Connect breathing circuit HME, inline suction, and mainstream capnograph
- Inflate cuff BEFORE ventilation
- Turn oxygen on
- Confirm capnography
- Secure tracheal tube with tie and note tube depth
- Start sedation/anaesthesia
- Check tracheal tube cuff pressure; must be at least 5cmH<sub>2</sub>O above inspiratory pressure to minimise leak
- If the circuit must be disconnected occlude the tracheal tube with a clamp before detaching, and leave the filter on the patient side
- Clean anaesthetic machine and breathing circuit with 'Clinell' wipe
- Clean patient's face, neck, hair, and hands with soap and water
- Do not leave the room until 20 minutes have elapsed post-intubation
- Consider inserting NG tube and/or central venous access



# T3-5: MERIT Team Procedures

**Objective:** Airway management, ventilation, and transfer of a COVID-19 patient. To be used in conjunction with PPE guidelines (**Action Card 8a: PPE for AGP/T2-1: Donning PPE in Theatre**), **T3-1: Preparation for intubation**, and **T3-2: Intubation of a COVID-19 patient**

- 1 Check patient history**
  - ↳ Collect brief history and allergy status
  - ↳ Check the patient has a wristband
- 2 Prepare for intubation (see Preparation)**
  - ↳ Don and check PPE for aerosol generating procedure
  - ↳ Collect **T2-1: Preparation for Intubation of COVID-19 patient** and follow steps
  - ↳ Collect **T2-2: Intubation of COVID-19 patient**
  - ↳ Prepare a Waters Circuit with HME filter between patient and APL valve
  - ↳ Attach mainstream capnograph on clean side of Waters Circuit
  - ↳ Prepare mechanical ventilator
  - ↳ Prepare a tracheal tube clamp
- 3 Perform intubation per action card**
  - ↳ Check tube position with Waters Circuit and capnograph
  - ↳ Apply clamp to tracheal tube then disconnect the circuit above the HME filter
  - ↳ Connect the mechanical ventilator and unclamp the tracheal tube
  - ↳ Start mechanical ventilation using *recommended ventilation strategy for ARDS*
- 4 Check cardiovascular stability**
  - ↳ Give vasopressors early to avoid excessive fluid challenges after initial resuscitation phase
- 5 Check blood gas**
- 6 Prepare for transfer**
  - ↳ Call ICU bed co-ordinator to determine transfer destination
  - ↳ Check consumables prior to departure and syringes labelled for ICU
  - ↳ Tape breathing circuit joins
  - ↳ Avoid secondary transfers e.g. to radiology en-route to ICU

## Preparation

- Intubation is an aerosol generating procedure, so AGP PPE is required for all known or suspected COVID-19 patients per **Action Card 8a: PPE for AGP** (or **Action Card 8c: Confirmed or suspected COVID-19: alternative PPE for AGP** if required)
- Intubation in ED should take place in Resus 3 if possible (negative pressure room)
- The MERIT team have the final say in the location of intubation if difficulty is predicted
  - Minimise transfers by moving directly to ICU for intubation if ED is unsuitable

## Recommended Ventilation Strategy for ARDS

- Pressure controlled ventilation (BIPAP)
  - $P_{insp} \leq 35 \text{ cmH}_2\text{O}$
  - $P_{plat} \leq 28 \text{ cmH}_2\text{O}$
  - $PEEP \geq 10 \text{ cmH}_2\text{O}$
  - Driving pressure ( $P_{plat} - PEEP$ )  $< 15 \text{ cmH}_2\text{O}$
  - Tidal volume 6-8ml/kg predicted body weight
- Allow permissive hypercapnia

### Target Values

- $SpO_2$ : 90-94%
- $pH > 7.3$
- $PaCO_2 < 6 \text{ kPa}$

### Predicted Body Weight Formula

- Male:  $50 + (0.91 \times [\text{height in cm} - 152.4])$
- Female:  $45.5 + (0.91 \times [\text{height in cm} - 152.4])$

If difficulty achieving target values early discussion with CRT consultant for escalation to SRF or ECMO teams

## Useful contacts

- All MERIT referrals must be made through the CRT team on your site
- STH ICU Bed co-ordinator: 1556
- Internal MERIT Communications:
  - STH MERIT 1 Consultant: 0981 / ODP: 0983
  - STH MERIT 2 Consultant: 0982 / ODP: 0984
  - Guy's MERIT 1 Consultant: 0985 / ODP: 0986

eFig. 4 Devices used for intubation (%)

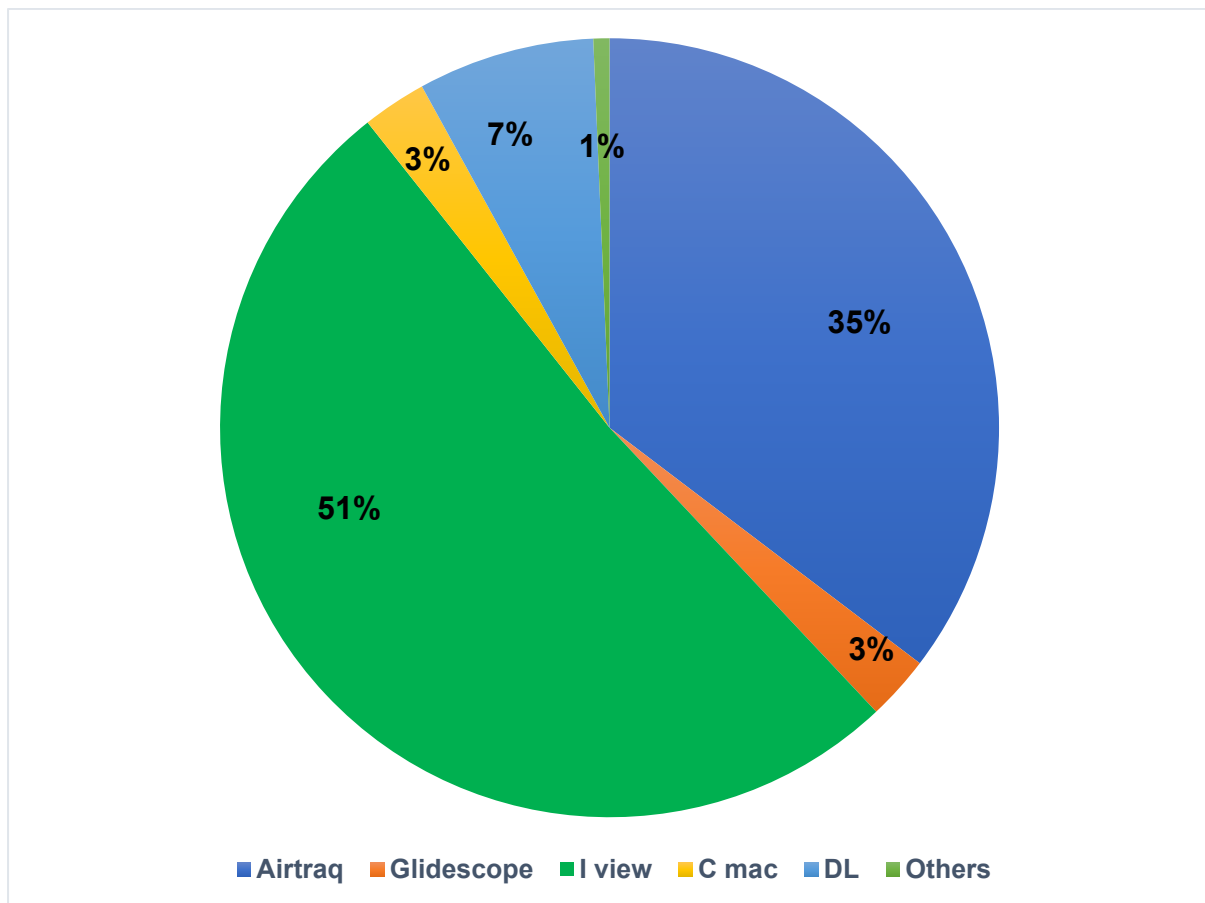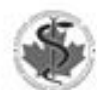

Supplement: 12630_2020_1804_MOESM1_ESM.pdf [file 12630_2020_1804_MOESM1_ESM.pdf]
